# Supplementary material for: Expression of Cry2Aa, a Bacillus thuringiensis insecticidal protein in transgenic pigeon pea confers resistance to gram pod borer, Helicoverpa armigera
Source: PubMed Central journal article supplement (PMC5995972; doi:10.1038/s41598-018-26358-9), 2018-06-11
Supplement: 41598_2018_26358_MOESM1_ESM.pdf [file 41598_2018_26358_MOESM1_ESM.pdf]

**Expression of *Cry2Aa*, a *Bacillus thuringiensis* insecticidal protein in transgenic pigeon pea confers resistance to gram pod borer, *Helicoverpa armigera***

Shweta Singh<sup>#</sup>, Nikhil Ram Kumar<sup>#</sup>, R. Maniraj<sup>#</sup>, R. Lakshmikanth, K. Y. S. Rao, N. Muralimohan, T. Arulprakash, K. Karthik, N. B. Shashi Bhushan<sup>3</sup>, T. Vinutha<sup>1</sup>, Debasis Pattanayak, Prasanta K Dash, P. Ananda Kumar<sup>2</sup> and Rohini Sreevathsa\*

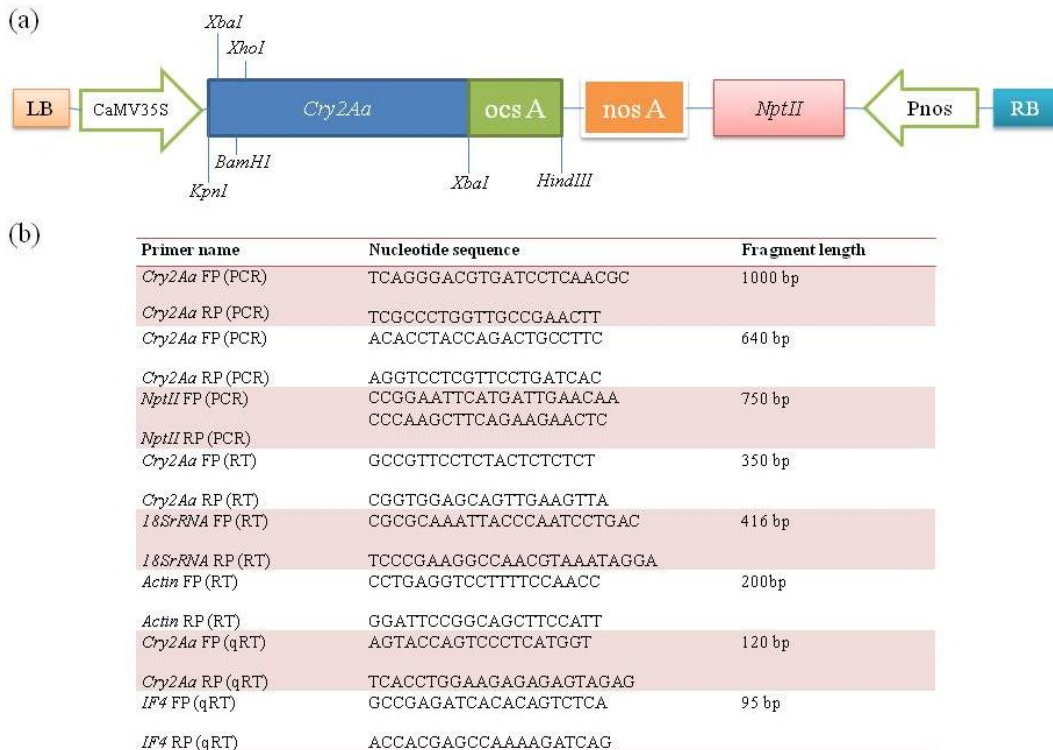

Supplementary figure S1: (a) Vector map of the binary vector pBinAR harboring *cry2Aa* and *nptII* used to generate transformants; (b) List of various primers used in the study

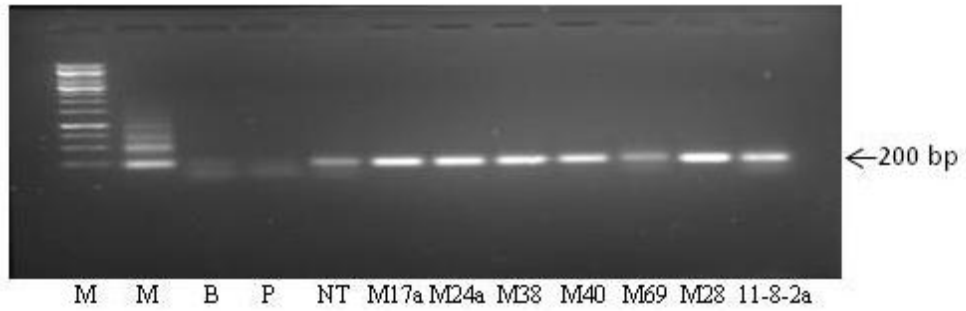

Supplementary figure S2 (original gel picture of Fig. 6c [ii]): Semi quantitative RT-PCR analysis of the selected transgenic plants *vis a vis* non transgenic for the detection of 200 bp actin transcript (M: ladder; B: template blank; NT: non transgenic; P: plasmid);
